# Supplementary material for: Attenuation of Scopolamine-Induced Amnesia via Cholinergic Modulation in Mice by Synthetic Curcumin Analogs
Source: MDPI journal article supplement (doi:10.3390/molecules27082468), 2022-04-11

Proton NMR spectra of synthesized curcumin analog (**1a**)

A5\_1HNMR\_CDCL3

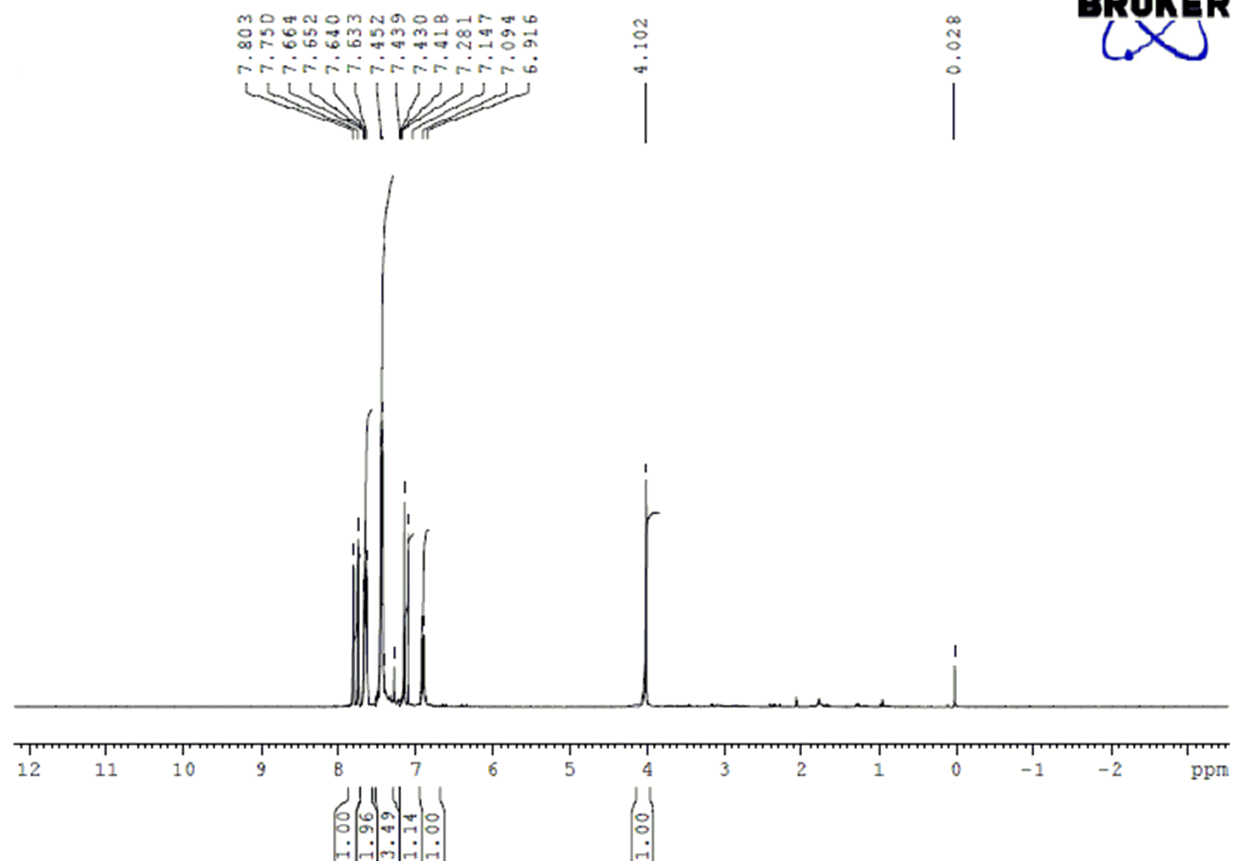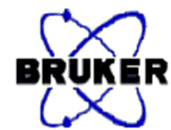

Proton NMR spectra of synthesized curcumin analog (**1b**)

H16\_1HNMR\_CDCL3

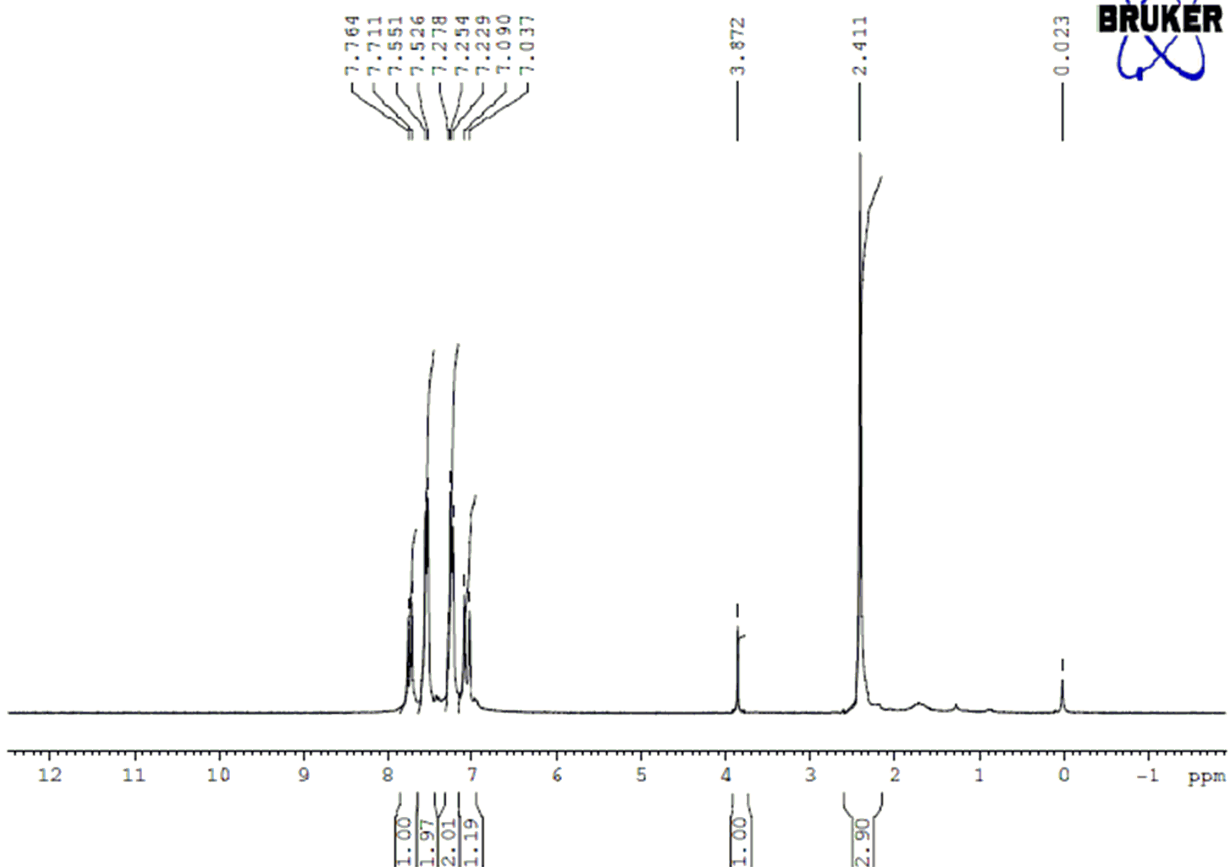

Proton NMR spectra of synthesized curcumin analog (**1d**)

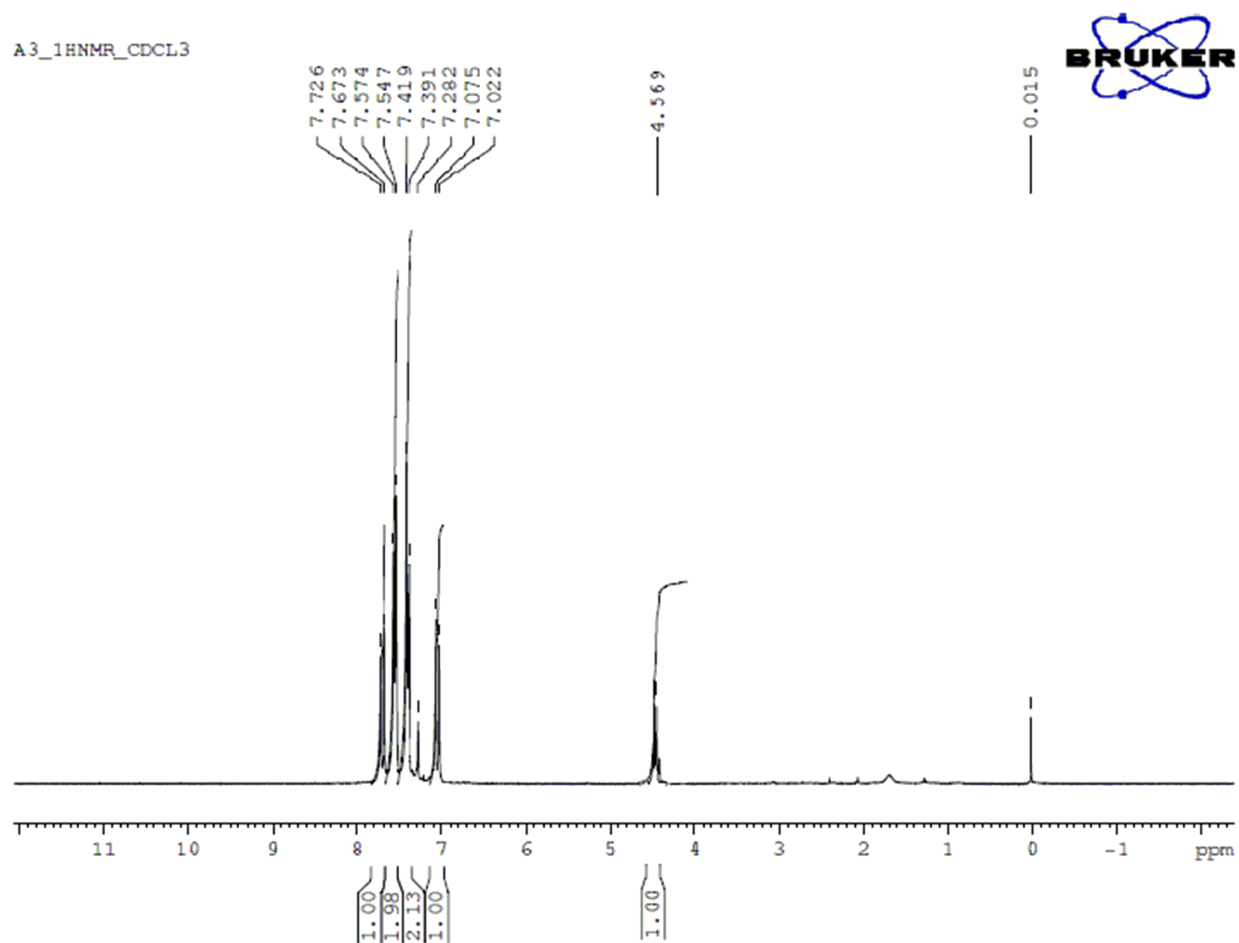

Proton NMR spectra of synthesized curcumin analog (**1e**)

H2O\_1HNMR\_CDCL3

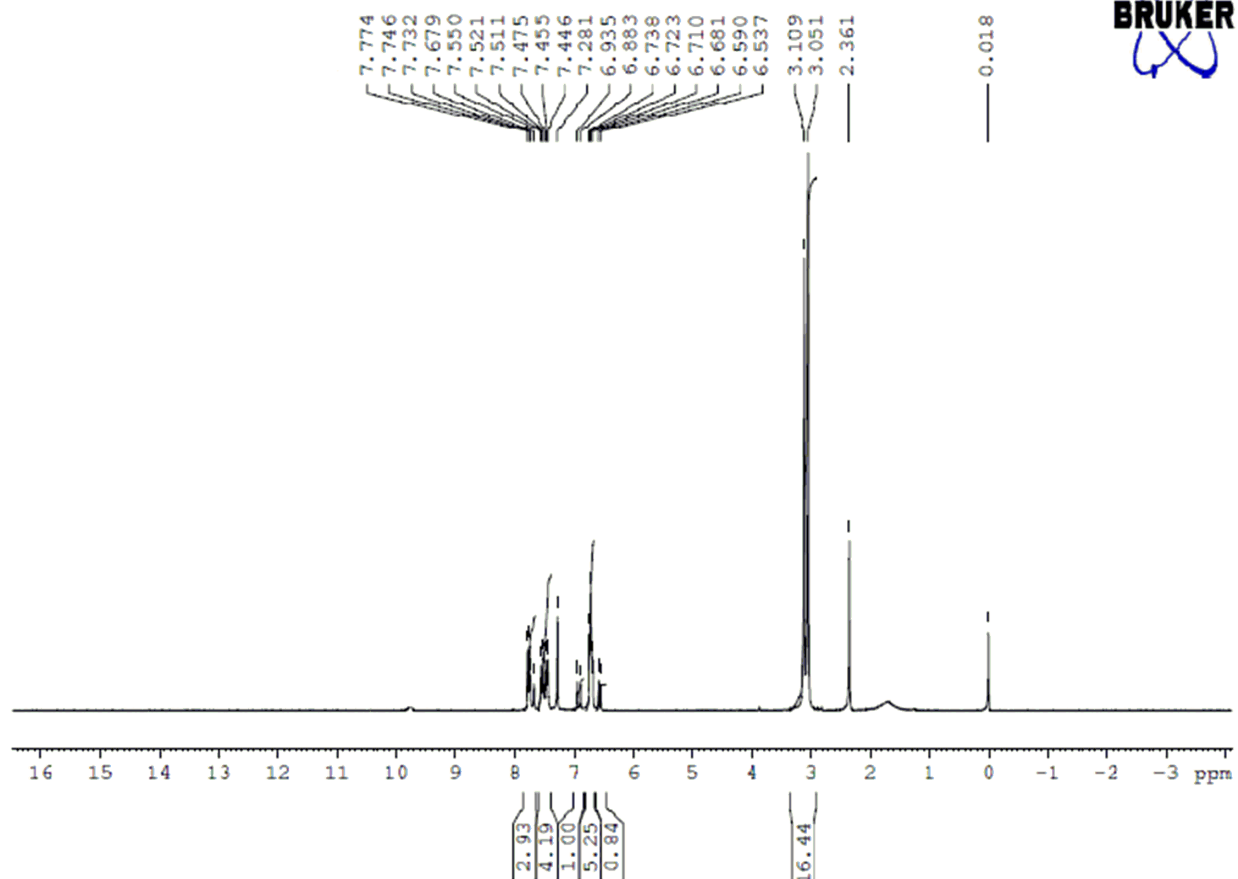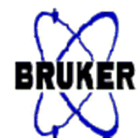

## Proton NMR spectra of synthesized curcumin analog (**1f**)

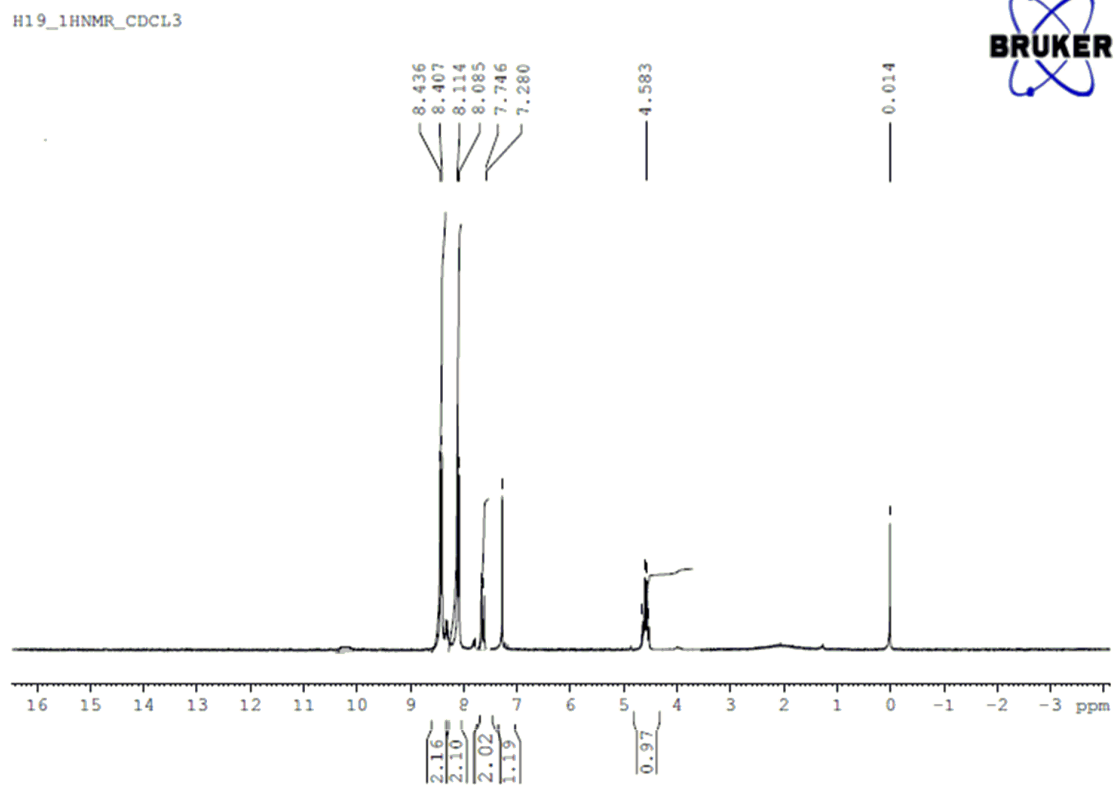

## Mass Spectra

**1a**

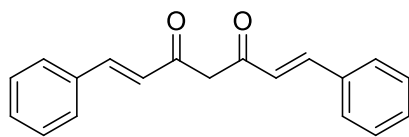

Exact Mass: 276.12

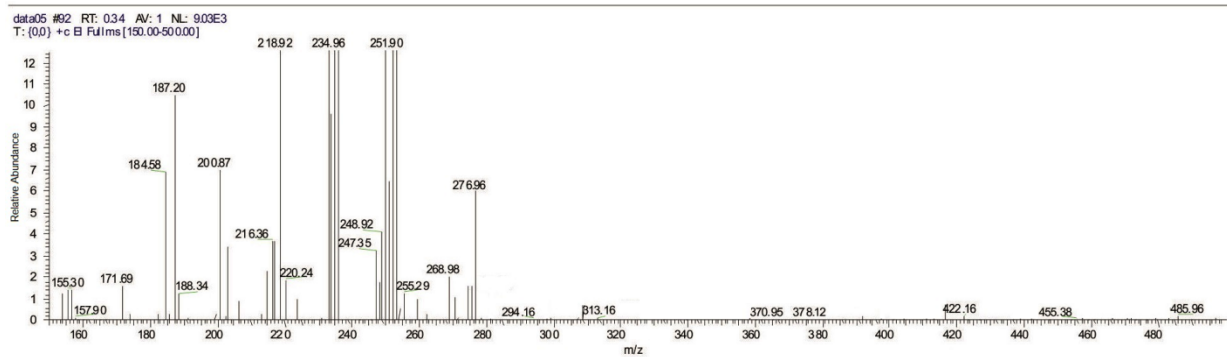

**1b**

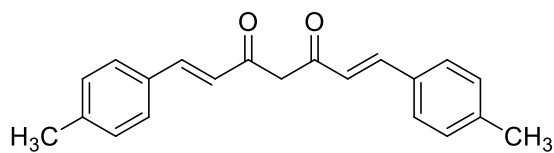

Exact Mass: 304.15

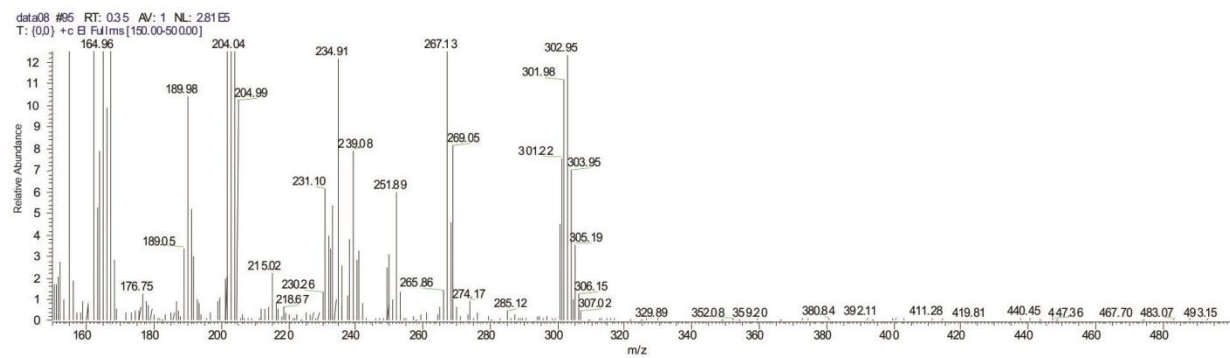

**1d**

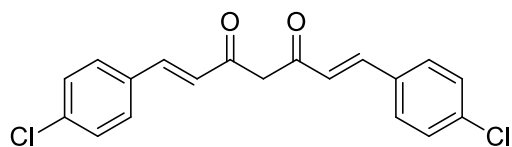

Exact Mass: 344.04

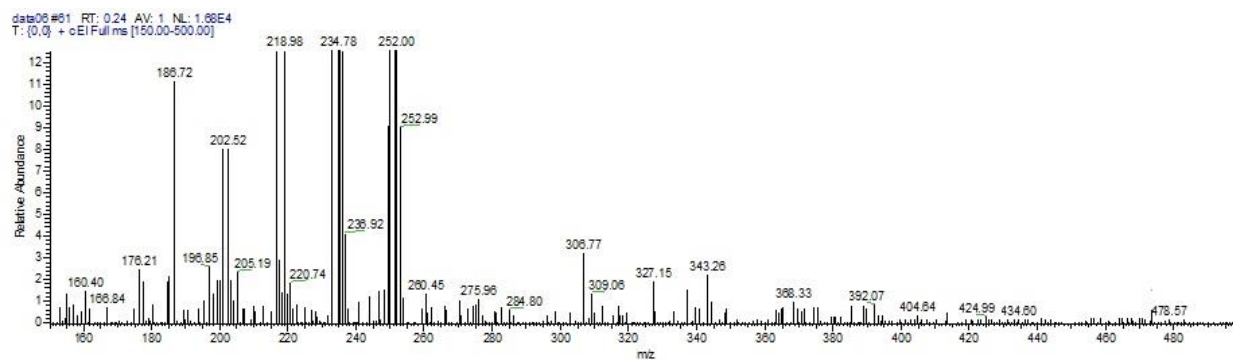

1e

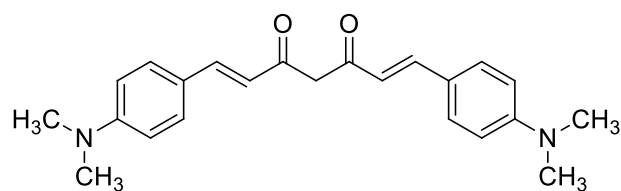

Exact Mass: 362.20

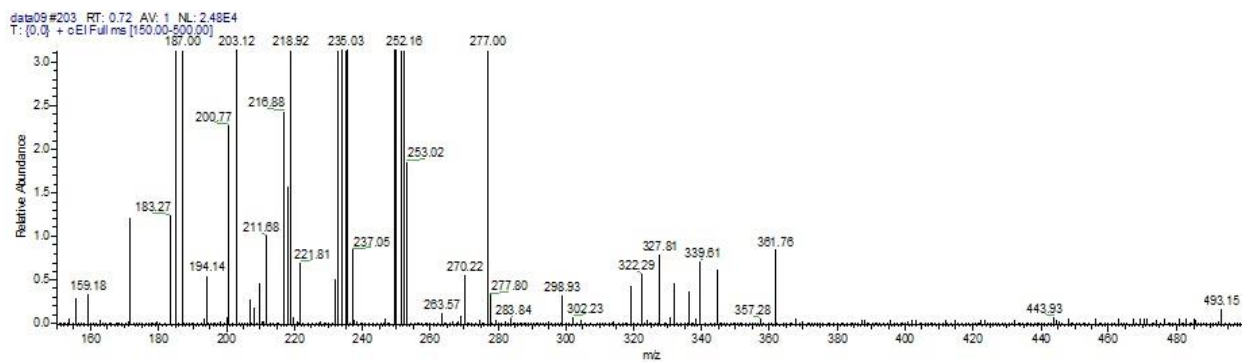

Supplement: s1 [file s1]
